# Supplementary material for: High expression of intratumoral stromal proteins is associated with chemotherapy resistance in breast cancer
Source: PubMed Central journal article supplement (PMC5342408; doi:10.18632/oncotarget.10894), 2016-07-28
Supplement: oncotarget-07-55155-s001.pdf [file oncotarget-07-55155-s001.pdf]

## High expression of intratumoral stromal proteins is associated with chemotherapy resistance in breast cancer

### Supplementary Materials

**Supplementary Table S1: Dilutions, manufacturers for antibodies used and cut-offs for immunohistochemistry (IHC) staining**

| Antibodies                 | Clones, dilutions and Manufacturers | Cut-offs for low vs high expression                   |
|----------------------------|-------------------------------------|-------------------------------------------------------|
| THBS1 <sup>a</sup>         | 1:200, R&D System                   | Intensity 0 and 1 vs 2 and 3 <sup>b</sup>             |
| TNC <sup>a</sup>           | 1:1000, Abcam                       | Intensity 0 and 1 vs 2 and 3 <sup>b</sup>             |
| FN <sup>a</sup>            | 1:300, R&D System                   | Intensity 0 and 1 vs 2 and 3 <sup>b</sup>             |
| SPARC <sup>a</sup>         | 1:150, R&D System                   | Intensity 0 and 1 vs 2 and 3 <sup>b</sup>             |
| $\alpha$ -SMA <sup>a</sup> | 1:400, DAKO                         | Positive staining $\leq 50$ vs $\geq 50$ <sup>c</sup> |

<sup>a</sup>IHC scoring on cancer-associated stroma; <sup>b</sup>intensity 0 to 3, representing negative, mild, moderate and strong immunostaining; <sup>c</sup>determined by receiver-operating characteristic curve using SPSS software.

**Supplementary Table S2: Relation between baseline expression of stromal proteins and estrogen receptor status, intrinsic response and pathological lymph node involvement**

| Stromal proteins               |                                            | <i>N</i> | Mean $\pm$ SD     | <i>P</i> <sup>a</sup> |
|--------------------------------|--------------------------------------------|----------|-------------------|-----------------------|
|                                | <b>Estrogen receptor status</b>            |          |                   |                       |
| <b>THBS1</b>                   | Negative                                   | 21       | 1.38 $\pm$ 0.97   | 0.155                 |
|                                | Positive                                   | 36       | 1.00 $\pm$ 0.83   |                       |
| <b>TNC</b>                     | Negative                                   | 31       | 2.52 $\pm$ 0.68   | 0.065                 |
|                                | Positive                                   | 36       | 2.19 $\pm$ 0.75   |                       |
| <b>FN</b>                      | Negative                                   | 29       | 1.86 $\pm$ 0.79   | 0.772                 |
|                                | Positive                                   | 37       | 1.81 $\pm$ 0.81   |                       |
| <b>SPARC</b>                   | Negative                                   | 11       | 1.05 $\pm$ 0.86   | 0.159                 |
|                                | Positive                                   | 16       | 1.21 $\pm$ 0.83   |                       |
| <b><math>\alpha</math>-SMA</b> | Negative                                   | 27       | 35.74 $\pm$ 33.50 | 0.52                  |
|                                | Positive                                   | 27       | 30.04 $\pm$ 27.56 |                       |
|                                | <b>Intrinsic response</b>                  |          |                   |                       |
| <b>THBS1</b>                   | Resistant                                  | 30       | 1.30 $\pm$ 0.75   | 0.73                  |
|                                | Sensitive                                  | 36       | 1.25 $\pm$ 1.05   |                       |
| <b>TNC</b>                     | Resistant                                  | 35       | 2.31 $\pm$ 0.63   | 0.779                 |
|                                | Sensitive                                  | 44       | 2.32 $\pm$ 0.77   |                       |
| <b>FN</b>                      | Resistant                                  | 38       | 1.76 $\pm$ 0.79   | 0.218                 |
|                                | Sensitive                                  | 42       | 1.98 $\pm$ 0.78   |                       |
| <b>SPARC</b>                   | Resistant                                  | 14       | 1.04 $\pm$ 0.96   | 0.888                 |
|                                | Sensitive                                  | 14       | 1.17 $\pm$ 0.78   |                       |
| <b><math>\alpha</math>-SMA</b> | Resistant                                  | 31       | 29.68 $\pm$ 27.96 | 0.454                 |
|                                | Sensitive                                  | 39       | 34.00 $\pm$ 31.16 |                       |
|                                | <b>Pathological lymph node involvement</b> |          |                   |                       |
| <b>THBS1</b>                   | Negative                                   | 16       | 1.25 $\pm$ 1.00   | 0.98                  |
|                                | Positive                                   | 28       | 1.25 $\pm$ 0.93   |                       |
| <b>TNC</b>                     | Negative                                   | 20       | 2.30 $\pm$ 0.57   | 0.683                 |
|                                | Positive                                   | 34       | 2.18 $\pm$ 0.80   |                       |
| <b>FN</b>                      | Negative                                   | 20       | 2.10 $\pm$ 0.72   | 0.036                 |
|                                | Positive                                   | 35       | 1.66 $\pm$ 0.80   |                       |
| <b>SPARC</b>                   | Negative                                   | 7        | 0.94 $\pm$ 0.77   | 0.132                 |
|                                | Positive                                   | 9        | 1.23 $\pm$ 0.86   |                       |
| <b><math>\alpha</math>-SMA</b> | Negative                                   | 18       | 36.04 $\pm$ 31.77 | 0.277                 |
|                                | Positive                                   | 32       | 25.78 $\pm$ 27.42 |                       |

a: Mann-Whitney *U* test.

**Supplementary Table S3: Association between changes of stromal proteins following chemotherapy and tumor estrogen receptor (ER) status in the primary cohort**

|                             | BL           | C1            | C2            | <i>P</i> <sup>a</sup> (C1 vs BL) | <i>P</i> <sup>a</sup> (C2 vs BL) |
|-----------------------------|--------------|---------------|---------------|----------------------------------|----------------------------------|
|                             | Mean ± S D   |               |               |                                  |                                  |
| <b>ER positive (n = 37)</b> |              |               |               |                                  |                                  |
| THBS1                       | 1.00 ± 0.82  | 1.60 ± 0.97   | 1.53 ± 0.88   | <b>0.001</b>                     | <b>0.012</b>                     |
| TNC                         | 2.19 ± 0.74  | 2.62 ± 0.56   | 2.62 ± 0.60   | <b>0.006</b>                     | <b>0.021</b>                     |
| FN                          | 1.81 ± 0.81  | 2.11 ± 0.80   | 2.23 ± 0.92   | 0.279                            | 0.061                            |
| SPARC                       | 1.21 ± 0.83  | 1.25 ± 1.00   | 1.38 ± 0.98   | 0.979                            | 0.182                            |
| α-SMA                       | 31.9 ± 26.8  | 34.17 ± 32.69 | 31.91 ± 26.82 | 0.574                            | 0.172                            |
| <b>ER negative (n = 31)</b> |              |               |               |                                  |                                  |
| THBS1                       | 1.38 ± 0.97  | 1.52 ± 0.81   | 1.42 ± 0.81   | 0.248                            | 0.623                            |
| TNC                         | 2.51 ± 0.68  | 2.74 ± 0.68   | 2.54 ± 0.78   | 0.145                            | 0.855                            |
| FN                          | 1.86 ± 0.789 | 2.01 ± 0.74   | 2.00 ± 0.80   | 0.31                             | 0.571                            |
| SPARC                       | 1.05 ± 0.86  | 1.55 ± 0.95   | 1.49 ± 0.94   | 0.119                            | 0.21                             |
| α-SMA                       | 35.7 ± 33.5  | 42.39 ± 28.52 | 47.7 ± 29.0   | 0.735                            | 0.649                            |

<sup>a</sup>Wilcoxon Signed Ranks Test; ER: estrogen receptor; BL: baseline; C1: cycle 1; C2: cycle 2.
